# Supplementary material for: Phosphorus release from sewage sludge and digestate driven by biological sulfate reduction: effect of feed sulfate concentration and thermal hydrolysis
Source: Royal Society of Chemistry journal article supplement (doi:10.1039/d4ew00322e), 2024-01-01
Supplement: d4ew00322e1.pdf [file d4ew00322e1.pdf]

## Supplementary Material

### Phosphorus release from waste sludge and digestate driven by biological sulfate reduction: effect of feed sulfate concentration and thermal hydrolysis

Francesco Di Capua<sup>a</sup>, Stefano Papirio<sup>b,\*</sup>, Silvio Matassa<sup>b</sup>, Francesco Pirozzi<sup>b</sup>, Giovanni Esposito<sup>b</sup>

<sup>a</sup> School of Engineering, University of Basilicata, via dell'Ateneo Lucano 10, Potenza, Italy

<sup>b</sup> Department of Civil, Architectural and Environmental Engineering, University of Naples Federico II, via Claudio 21, Naples, Italy

#### \*Corresponding author

Dr. Stefano Papirio, Associate professor

Email: [stefano.papirio@unina.it](mailto:stefano.papirio@unina.it)

Phone: 0039 081 76 83441

#### Contents

|                                                                                                                                                                                                                                                                              |   |
|------------------------------------------------------------------------------------------------------------------------------------------------------------------------------------------------------------------------------------------------------------------------------|---|
| <b>Table S1</b> – Soluble chemical oxygen demand (sCOD) concentrations and ratio between sCOD and total COD (tCOD) at different durations of thermal hydrolysis performed at 90°C on sludge digestate prior to biological sulfate reduction aimed at phosphate release. .... | 2 |
| <b>Fig. S1</b> – Temporal profiles of sulfate reduction and phosphate release with sewage sludge at different feed sulfate concentrations during <i>Test 1</i> . ....                                                                                                        | 3 |
| <b>Table S2</b> – Concentrations of total COD (tCOD) and soluble COD (sCOD) at the end of the sulfate reduction tests with hydrolyzed digestate at fed SO <sub>4</sub> <sup>2-</sup> concentration ranging from 0 to 6000 mg/L. ....                                         | 4 |

**Table S1** – Soluble chemical oxygen demand (sCOD) concentrations and ratio between sCOD and total COD (tCOD) at different durations of thermal hydrolysis performed at 90°C on sludge digestate prior to biological sulfate reduction aimed at phosphate release.

| <b>Duration (h)</b> | <b>sCOD (mg/L)</b> | <b>sCOD/tCOD (%)</b> |
|---------------------|--------------------|----------------------|
| 0                   | 286±20             | 1.4                  |
| 1                   | 1829±152           | 9.0                  |
| 2                   | 4143±40            | 20.4                 |
| 4                   | 4910±57            | 24.2                 |

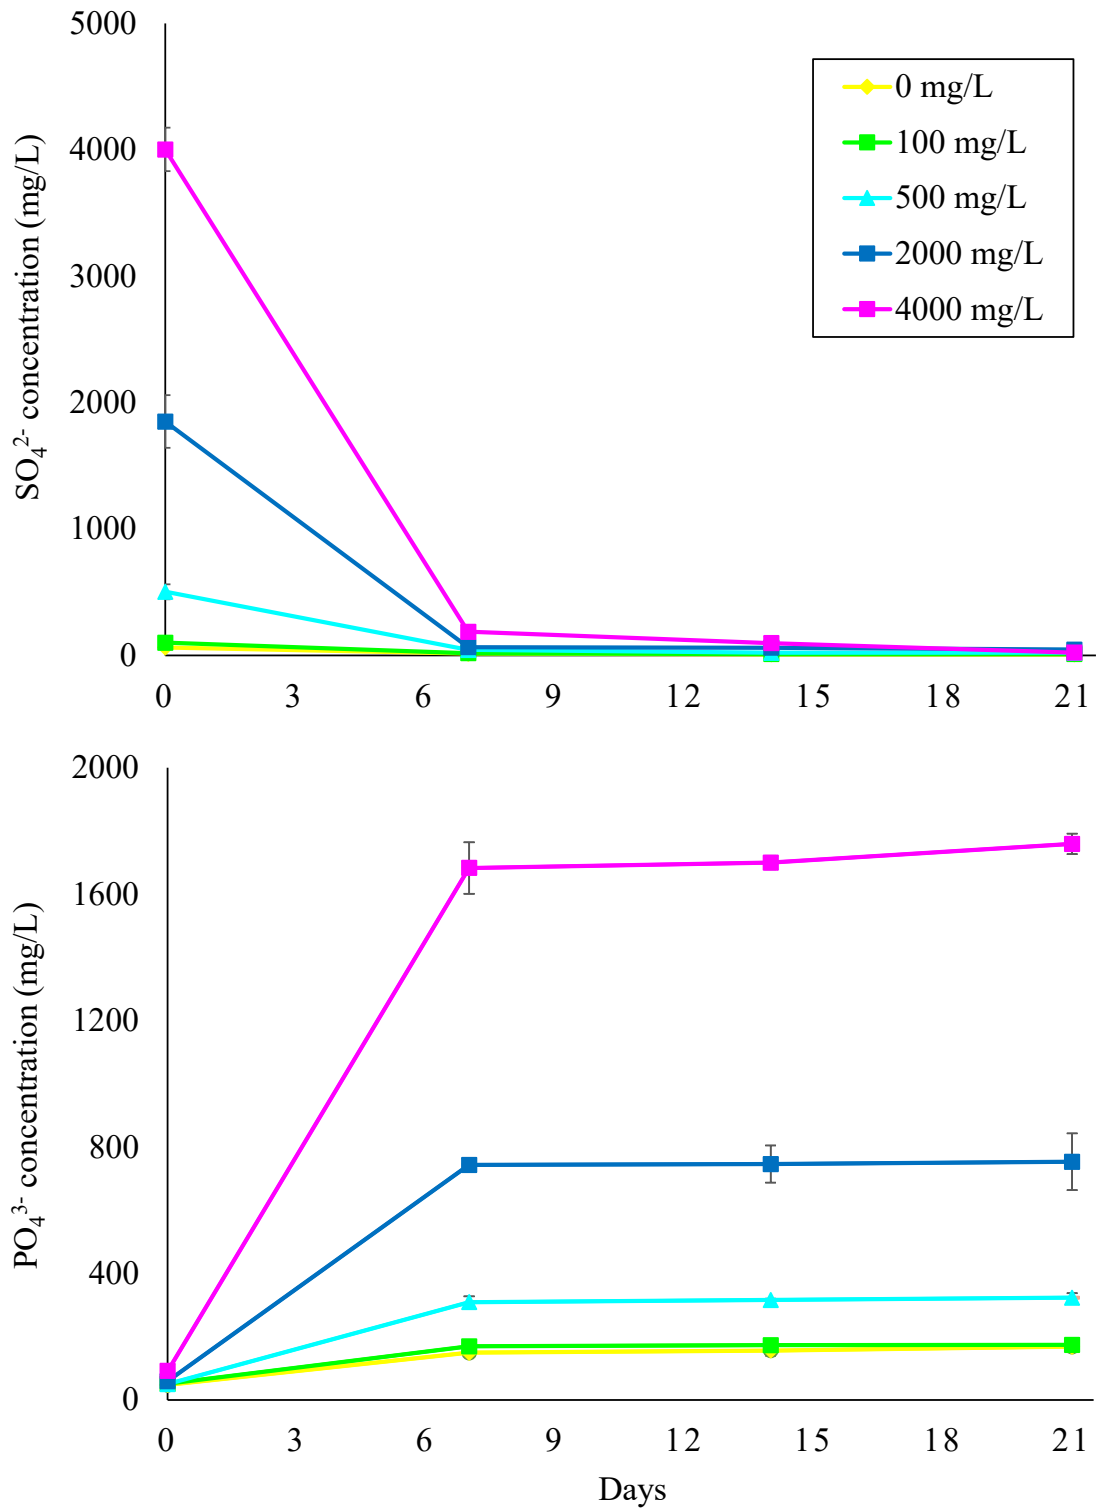

**Fig. S1** – Temporal profiles of sulfate reduction and phosphate release with sewage sludge at different feed sulfate concentrations during *Test 1*.

**Table S2** – Concentrations of total (tCOD) and soluble COD (sCOD) at the end of the sulfate reduction tests with hydrolyzed digestate at fed  $\text{SO}_4^{2-}$  concentration ranging from 0 to 6000 mg/L.

| <b>Added <math>\text{SO}_4^{2-}</math> concentration (mg/L)</b> | <b>tCOD (mg/L)</b> | <b>sCOD (mg/L)</b> |
|-----------------------------------------------------------------|--------------------|--------------------|
| 0                                                               | 26,175±2,375       | 2,244±20           |
| 2000                                                            | 10,925±125         | 974±40             |
| 4000                                                            | 14,050±2,625       | 699±5              |
| 6000                                                            | 12,675±500         | 534±0              |
